# Supplementary material
Source: MDPI journal article supplement (https://www.mdpi.com/2313-4321/3/3/33)
Supplement: s1 [file s1]

## Data specifications

The following tables show the data points gathered during the data collection stage. The data points represent costs, employment numbers, and distances and weights related to the collection, transport, sorting, and recycling of plastic waste. Any data that do not appear in this table but are used in the model simulations can be retrieved directly from the previous study by Plastic Recyclers Europe [1]— for instance, CO<sub>2</sub> emission factors etc. which are not specifically related to Sweden.

**Table S1.** Data related to the collection, sorting, transport, and recycling of plastic waste and the deposit system in Sweden.

| Category                                                                 | Data point | Unit                       | Source  |
|--------------------------------------------------------------------------|------------|----------------------------|---------|
| <i>Collection</i>                                                        |            |                            |         |
| Cost: Door-to-door collection                                            | 253        | EUR/tonne                  | [1]     |
| Cost: Bring sites                                                        | 111        | EUR/tonne                  | [1]     |
| Cost: Recycling centres                                                  | 49         | EUR/tonne                  | [1]     |
| Cost: Return system                                                      | 1773       | EUR/tonne                  | [2]     |
| Employment: Door-to-door collection                                      | 40         | FTE/10000t                 | [1]     |
| Employment: Bring sites                                                  | 21         | FTE/10000t                 | [1]     |
| Employment: Recycling centres                                            | 9          | FTE/10000t                 | [1]     |
| Employment: Return system                                                | 21         | FTE/10000t                 | [1]     |
| <i>Recycling</i>                                                         |            |                            |         |
| Cost of operation of recycling facilities                                | 490        | EUR/tonne                  | [3] [4] |
| Employment in recycling facilities per 10 000 tonne sorted waste         | 10         | FTE/10000t                 | [5] [6] |
| Cost of construction for new recycling facility                          | 24 630 542 | EUR                        | [7]     |
| <i>Transport</i>                                                         |            |                            |         |
| Cost of transport for recycling in Sweden                                | 15         | EUR/tonne                  | [1]     |
| Cost of transport for recycling in Germany                               | 15         | EUR/tonne                  | [1]     |
| Cost of transport for recycling in China                                 | 25         | EUR/tonne                  | [8]     |
| CO <sub>2</sub> -emissions for shipping of one container to China by sea | 8.4        | gCO <sub>2</sub> /tonne-km | [9]     |
| <i>Sorting</i>                                                           |            |                            |         |
| Cost of operation of sorting facilities                                  | 191.1      | EUR/tonne                  | [1]     |
| Employment in sorting facilities                                         | 17         | FTE/10000t                 | [1]     |

**Note:** FTE = Full-time Equivalent

**Table 2.** Data related to costs of end-of-life vehicles, waste electrical, and electronic equipment (WEEE), and incineration and landfilling in Sweden.

| Category                                         | Data point | Unit      | Source                                    |
|--------------------------------------------------|------------|-----------|-------------------------------------------|
| <i>End-of-life vehicles (ELV)</i>                |            |           |                                           |
| Average cost of collection of ELV                | 61         | EUR/tonne | [10]                                      |
| Average cost of dismantling or shredding of ELV  | 34         | EUR/tonne | [11]                                      |
| Average revenues from ferrous material           | 246        | EUR/tonne | [12]                                      |
| Average revenues from non-ferrous material       | 1306       | EUR/tonne | [12]                                      |
| Cost of landfilling ELV shredder waste in Sweden | 79         | EUR/tonne | [12]                                      |
| <i>WEEE</i>                                      |            |           |                                           |
| Average cost of collection and recycling         | 370        | EUR/tonne | [1] adjusting to inflation 2006–2012 [13] |

The energy source mix for electricity production in Sweden consists of 40.47% hydro, 39.7% nuclear, 9.59% conventional thermal, 10.15% wind, and 0.09% solar [15].

Finally, the average prices of recycled plastics on the market over the period of the last three years (April 2015–April 2018) are presented in Table 4.

**Table 3.** Average prices of recycled plastics in the European markets [16].

| Type of plastic | PET | PE-HD | PE-LD | PP  | PS  | PVC | Others |
|-----------------|-----|-------|-------|-----|-----|-----|--------|
| EUR / tonne     | 450 | 750   | 700   | 700 | 800 | 450 | 700    |

**Table 4.** General data on Sweden as the scope of modelling the plastic waste value chain.

| Indicator                           | Value in Sweden                                   | % of EU28 | Reference year | Source   |
|-------------------------------------|---------------------------------------------------|-----------|----------------|----------|
| Population                          | 9 995 153                                         | 1.95%     | 2017           | [17]     |
| Gross Domestic Product (GDP)        | 477 383 million EUR                               | 3.1%      | 2017           | [18]     |
| GDP/capita                          | 47 761 EUR per person                             | -         | 2017           | [17][18] |
| Land area                           | 447 435 km <sup>2</sup>                           | 9.8%      | 2017           | [19]     |
| Domestic Material Consumption (DMC) | 224 Mt                                            | 3.4%      | 2014           | [20]     |
| DMC/capita                          | 23.1 tonnes per person                            | -         | 2014           | [20]     |
| Resource productivity (GDP/DMC)     | 1.75 EUR/kg                                       | -         | 2014           | [20]     |
| Total waste generation              | 167 Mt                                            | 6.7%      | 2014           | [21]     |
| Total plastic waste generation      | 301 kt                                            | 1.75%     | 2014           | [21]     |
| Structure of the economy            | agriculture: 2%<br>industry: 12%<br>services: 86% | -         | 2014           | [20]     |

## References

- Hestin, M.; Faninger, T.; Milios, L. *Increased EU plastics recycling targets: environmental, economic and social impact assessment*. BIO by Deloitte for Plastic Recyclers Europe: Brussels, Belgium, 2015.
- Returpack-PET Svenska AB. *Årsredovisning för Returpack-PET Svenska AB 2017*. Returpack-PET Svenska AB: Norrköping, Sweden, 2018.
- Swerec AB. *Årsredovisning och koncernredovisning för räkenskapsåret 2016*. Swerec AB: Lanna, Sweden, 2017.
- Kosior, E.; Churchward, G. *Development of a Food Grade PET recycling Process – Literature Review and Feasibility Study*; The Waste & Resources Action Programme: Banbury, Oxon, UK, 2004.
- Ottosson, T. (Deputy Director, Cleanaway PET Svenska AB, Norrköping, Sweden); Personal communication, 2 May 2018.

6. Ruther, C. (CFO, Swerec AB, Lanna, Sweden); Personal communication, 20 April, 2018.
7. FTI AB. Plastkretsen investerar i sorteringsanläggning. Available online: <http://www.ftiab.se/2351.html> (accessed on 23 April 2018).
8. iContainers. Ocean freight & instant container shipping rates. Available online: <https://www.icontainers.com/> (accessed on 15 May 2018).
9. European Chemical Transport Association. Guidelines for Measuring and Managing CO<sub>2</sub> Emission from Freight Transport Operations. Available online: [https://www.ecta.com/resources/Documents/Best%20Practices%20Guidelines/guideline\\_for\\_measuring\\_and\\_managing\\_co2.pdf](https://www.ecta.com/resources/Documents/Best%20Practices%20Guidelines/guideline_for_measuring_and_managing_co2.pdf) (accessed on 15 May 2018).
10. Forsman, J.A. (CEO, Ådelans, Kramfors, Sweden); Personal communication, 2 May 2018.
11. Carlsson, K. (Production manager, Stena Recycling AB, Gothenburg, Sweden); Personal communication, 19 April, 20128.
12. Jensen, C.; Felix, J.; Ljunggren Söderman, M.; Skenhall, S.A.; Rydberg, T. *Utvärdering av förändrad demontering och återvinning av uttjänta fordon i Sverige*; Report B2068; IVL Swedish Environmental Research Institute: Gothenburg, Sweden, 2012.
13. Eurostat. HICP (2015 = 100) - annual data (average index and rate of change) (prc\_hicp\_aind). Available online: <http://ec.europa.eu/eurostat/web/hicp/data/database> (accessed on 2 May 2018).
14. CEWEP. Country report Sweden 2016. Available online: [http://www.cewep.eu/wp-content/uploads/2016/07/sweden\\_country\\_report\\_2016.pdf](http://www.cewep.eu/wp-content/uploads/2016/07/sweden_country_report_2016.pdf) (accessed on 31 January 2018).
15. Statistics Sweden. Electricity supply, district heating and supply of natural gas 2016. Available online: [http://www.scb.se/contentassets/32c099cd9dab4db8999acc5e4401c871/en0105\\_2016a01\\_sm\\_en11sm1701.pdf](http://www.scb.se/contentassets/32c099cd9dab4db8999acc5e4401c871/en0105_2016a01_sm_en11sm1701.pdf) (accessed on 23 March 2018).
16. Plasticker. Rohstoffe & Preise. Available online: [https://plasticker.de/preise/preise\\_monat\\_single.php](https://plasticker.de/preise/preise_monat_single.php) (accessed on 11 May 2018).
17. Eurostat. Population on 1 January by age and sex (demo\_pjan). Available online: <http://ec.europa.eu/eurostat/web/population-demography-migration-projections/population-data/database> (accessed on 10 July 2018).
18. Eurostat. GDP and main components (output, expenditure and income) (nama\_10\_gdp). Available online: <http://ec.europa.eu/eurostat/web/national-accounts/data/database> (accessed on 10 July 2018).
19. Nordic Council of Ministers. Nordic Statistics 2017; Report 2017:748; Nordisk Ministerråd, Copenhagen, 2017. DOI: 10.6027/ANP2017-748
20. European Environment Agency. More from less –material resource efficiency in Europe. Country profile: Sweden. Available online: <http://www.eea.europa.eu/resource-efficiency> (accessed on 10 July 2018).
21. Eurostat. Generation of waste by waste category, hazardousness and NACE Rev. 2 activity (env\_wasgen). Available online: <http://ec.europa.eu/eurostat/web/environment/waste/database> (accessed on 10 July 2018).
